# Baboon Feeding Ecology Informs the Dietary Niche of *Paranthropus boisei*

Gabriele A. Macho\*

Research Laboratory for Archaeology (RLAHA), Oxford, England

## Abstract

Hominins are generally considered eclectic omnivores like baboons, but recent isotope studies call into question the generalist status of some hominins. *Paranthropus boisei* and *Australopithecus bahrelghazali* derived 75%–80% of their tissues'  $\delta^{13}\text{C}$  from  $\text{C}_4$  sources, i.e. mainly low-quality foods like grasses and sedges. Here I consider the energetics of *P. boisei* and the nutritional value of  $\text{C}_4$  foods, taking into account scaling issues between the volume of food consumed and body mass, and *P. boisei*'s food preference as inferred from dento-cranial morphology. Underlying the models are empirical data for *Papio cynocephalus* dietary ecology. *Paranthropus boisei* only needed to spend some 37%–42% of its daily feeding time (conservative estimate) on  $\text{C}_4$  sources to meet 80% of its daily requirements of calories, and all its requirements for protein. The energetic requirements of 2–4 times the basal metabolic rate (BMR) common to mammals could therefore have been met within a 6-hour feeding/foraging day. The findings highlight the high nutritional yield of many  $\text{C}_4$  foods eaten by baboons (and presumably hominins), explain the evolutionary success of *P. boisei*, and indicate that *P. boisei* was probably a generalist like other hominins. The diet proposed is consistent with the species' derived morphology and unique microwear textures. Finally, the results highlight the importance of baboon/hominin hand in food acquisition and preparation.

**Citation:** Macho GA (2014) Baboon Feeding Ecology Informs the Dietary Niche of *Paranthropus boisei*. PLoS ONE 9(1): e84942. doi:10.1371/journal.pone.0084942

**Editor:** Karen Hardy, Universidad Autonoma de Barcelona and University of York, Spain

**Received:** September 2, 2013; **Accepted:** November 29, 2013; **Published:** January 8, 2014

**Copyright:** © 2014 Gabriele Macho. This is an open-access article distributed under the terms of the Creative Commons Attribution License, which permits unrestricted use, distribution, and reproduction in any medium, provided the original author and source are credited.

**Funding:** Funding was provided by Ministerio de Ciencia e Innovación (CGL2010-20868). The funders had no role in study design, data collection and analysis, decision to publish, or preparation of the manuscript.

**Competing Interests:** The author has declared that no competing interests exist.

\* E-mail: Gabriele.Macho@rlaha.ox.ac.uk

## Introduction

*Papio* and *Theropithecus* are considered good analogues for an assessment of the adaptive suite of hominin dento-cranial and manual morphology relating to the lineages' dietary radiation and the ecological drivers underlying it [1–3]. Hominins and papionins have evolved under the same ecological conditions in East Africa, have been sympatric and synchron throughout their evolutionary history and exhibit broadly comparable pulses of speciations and extinctions [4,5]. Together with suids, hominins and baboons presumably shared the same dietary niche [6]. Except for *Theropithecus osvaldi* and its extant relative, *Theropithecus gelada*, papionins are selective omnivores [1,2,7,8], that is “... these animals are neither lawn mowers, chewing up everything in their pathway, nor statisticians, taking random samples.” [9, p. 312]. The composition of baboon diet differs between groups and individuals as a result of local habitats, seasonal fluctuations in resources and individual preferences [7,10]. This flexibility and selectivity enables baboons to extract the maximum amount of energy and nutrients from the foods available, even when the environments appear resource poor while, concomitantly, limiting the intake of tannins and excessive amounts of fibers; unlike grazers, baboons lack the gut physiology to digest large amounts of fibers [11,12,13]. By employing a selective feeding strategy, short-term, e.g. seasonal, fluctuations in resources can therefore be buffered [7]. This is important for a large-brained, slow-growing primate [14,15], as brains are expensive to grow and to maintain and require a constant supply of energy-rich foods [16]. With this in mind, large-brained hominins are expected to have been selective

feeders too. Yet, isotope analyses imply that at least 2 early hominins, *Paranthropus boisei* from East Africa and *Australopithecus bahrelghazali* from Chad, spent some 75–80% (up to 91%) of their time feeding on grasses and sedges [17–20]; these foods are generally considered low-quality [17,19,21]. Neither hominin dento-cranial morphology nor broader biological considerations are consistent with such a grazing low quality diet. Here I explore whether the energetic requirements of *P. boisei* could have been met by a  $\text{C}_4$  diet, and bearing in mind the limitations of *P. boisei* dento-cranial morphology. The volume of  $\text{C}_4$  foods consumed by yearling baboons [9] is first scaled up to account for the larger body masses of hominins, and the respective nutritional yields are calculated. Adjustments are made to account for the greater manipulatory capabilities of adult baboons (and hominins) for the extraction and processing of corms. By varying the time allocated to eating various  $\text{C}_4$  sources, I then enquire how many minutes per day a 34–49 kg *Paranthropus boisei* [22] would have had to feed on  $\text{C}_4$  sources to meet approximately 80% of its daily energy requirements.

## Materials and Methods

In a landmark study, Altmann [9] meticulously recorded the feeding ecology of yearling, i.e. weanling, baboons (*Papio cynocephalus*) from the Amboseli National Park, Kenya, including the basic nutritional values of these foods (Tables S1, S2 in File S1); similarly detailed information is not available for adult baboons. However, evidence suggests that the foods consumed by adults differ little from those of yearling baboons [7]. Data for

immature baboons were thus considered appropriate to serve as a template for the models against which the feeding ecology of *P. boisei* was assessed. Only plants that could be identified as following the  $C_4$  photosynthetic pathway were selected [23–25];  $C_3$  foods were not considered. Although not identified as one of the core foods in Altmann's study, grasshoppers are eaten by baboons also and were included in the models, whereby the time feeding on them was set equivalent to that for dung beetles. As invertebrates may generally have played a significant role in the diet of hominins [26] and vertebrates were not included in the model at all, the outcomes for animal sources are likely an underestimation though.

The choice of immature baboons from the Amboseli as a template for adult hominin feeding ecology is justified on 2 grounds: First, nutrient requirements of immature primates are proportionally higher than they are for adults and may therefore be more comparable to the requirements of a larger-brained hominin than the diet of adult baboons would be. Second, the Amboseli National Park lies within the same phytogeographical zone as the *P. boisei* sites (Figure 1). This vegetation zone is dominated by Poaceae grasses and Cyperaceae sedges. The characteristics of the habitat have apparently changed relatively little since 2.7 Ma [27]. Hence, an understanding of whether, and how, yearling baboons extract high-quality foods from this seemingly impoverished habitat directly informs hominin evolution.

The volume of food consumed increases with body mass. Here I use the scaling factor determined by Ross et al. [28] whereby the volume of food consumed scales to body mass as  $V_d = 3.676 M_b^{0.919}$ . The values are related to the 2.27 kg yearling

baboons (average body mass) for whom the amounts of food eaten and the feeding times are known [9, Tables S1, S2 in File S1]. Yearling baboons, like adult baboons, spend considerable time feeding on corms (53 minutes) but, due to their lack of skills and physical strengths, find it difficult to extract corms from the ground and to subsequently process, i.e. clean and peel, them prior to ingestion [9]. In contrast, adult *P. ursinus* from the Drakensberg, South Africa, who extensively feed on corms on a seasonal basis, have been observed to efficiently extract corms by pulling bundles of grasses from the ground [11]. To account for the inefficient harvesting capabilities of immature baboons, a scaling factor for corm manipulation ( $m$ ) was therefore introduced. Adult baboons are assumed to double the rate of processing time per minute ( $B_j$ ) compared to yearling baboons ( $m = 2$ ) (Table S1 in File S1). The effects of higher scaling factors, i.e. 2.5 and 3 times, were also explored.

Time spent feeding on  $C_4$  sources was increased incrementally by 10 minutes from the yearling baboon baseline, i.e. some 88 minutes per day (202 kJ). The relative proportion of foods within each subset analysed (e.g., different kinds of corms, or fruits etc.) was retained in each model. The nutritional yield of the various models was outputted and was assessed against the animal's energetic requirements, its overall time budget for feeding and foraging, and the constraints imposed by its dento-cranial morphology.

*Paranthropus boisei* dental micro-morphology is ill equipped to dissipate the laterally-directed loads that would occur while shearing tough foods (Figure 2): it largely lacks enamel prism decussation, which provides the structural strengthening to the tissue that acts as a crack-stopping mechanism [29,30]. Decussation is brought about by the undulating/sinusoidal 3D paths of ameloblasts from the dentino-enamel junction to the outer enamel surface [31]; the amplitude and frequency of this wavy path generally decreases as the prisms approach the outer enamel surface [32–34]. Consecutive layers of prisms are slightly off-set with regard to the onset of this curve, largely due to a delay in onset of ameloblast activity (i.e., extension rate). This results in layers of prisms (and the crystal orientations within) being somewhat angled relative to each other, which makes it difficult for cracks to propagate easily through the tissue [35]. Although differences in individual prism paths between species appear subtle [33], the combined effects of these prism undulations along and between layers of prisms are remarkable, as can be appreciated from naturally broken surfaces (Figure 2, Figure S1 in File S1). They are species-specific. The biomechanical consequences are significant too [36–39]. Loading of parallel-oriented prisms, as in the case of *P. boisei*, would result in high tensile stresses between prisms when loaded at a high angle relative to the long axes of prisms [38], which would render the tooth vulnerable to transverse fractures [30] (Figure 2). To account for this limitation of *P. boisei* teeth, models were created where the feeding time was increased for those  $C_4$  foods only that are well suited to be broken down by the masticatory apparatus of *P. boisei* (i.e. those that require mainly vertical forces): hard, brittle or soft. These foods include corms [40], fruits, flowers and invertebrates (it is acknowledged that some  $C_4$  fruits may not be soft). No adjustments were made for the large tooth crown areas of *P. boisei* [41] and, presumably, greater processing capabilities. The models created deliberately aim to give a conservative estimate of the dietary ecology of *P. boisei*.

The energy requirements of *P. boisei* were calculated using Coelho's energetic model for daily expenditure  $DEE$  ( $\text{kcal } 24 \text{ h}^{-1}$ ) [42,43].

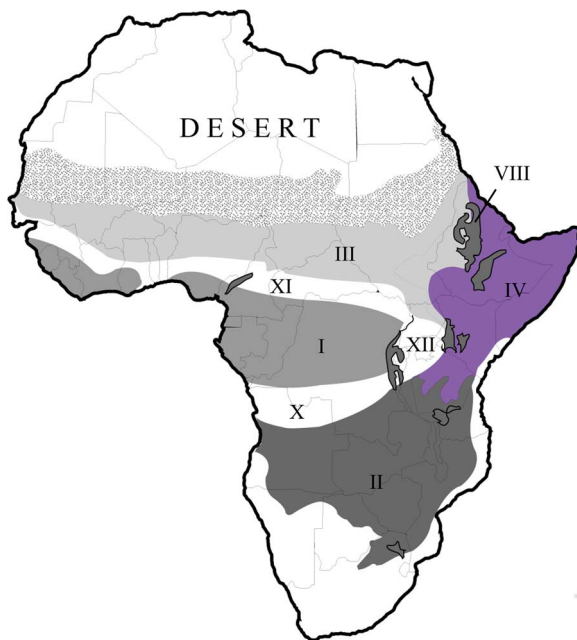

**Figure 1. Map of Africa showing the phytogeographical zones, adapted from [27].** The phytogeographical zone IV (Somalia-Masai steppe and shrubland) was occupied by *P. boisei* and is now occupied by the *Papio cynocephalus* population used in this study. I Guineo-Congolian humid forest, II Zambezian miombo woodland, III Sudanian woodland, IV Somalia-Masai steppe and shrubland, X–XII transition mosaic of forest/savanna/woodland, VIII Afriomontane domain. The location of the *A. bahrelghazali* sites in Chad falls outside these recognised zones (stippled). Hence, no attempt was made to more accurately assess the possible dietary ecology of this species. doi:10.1371/journal.pone.0084942.g001

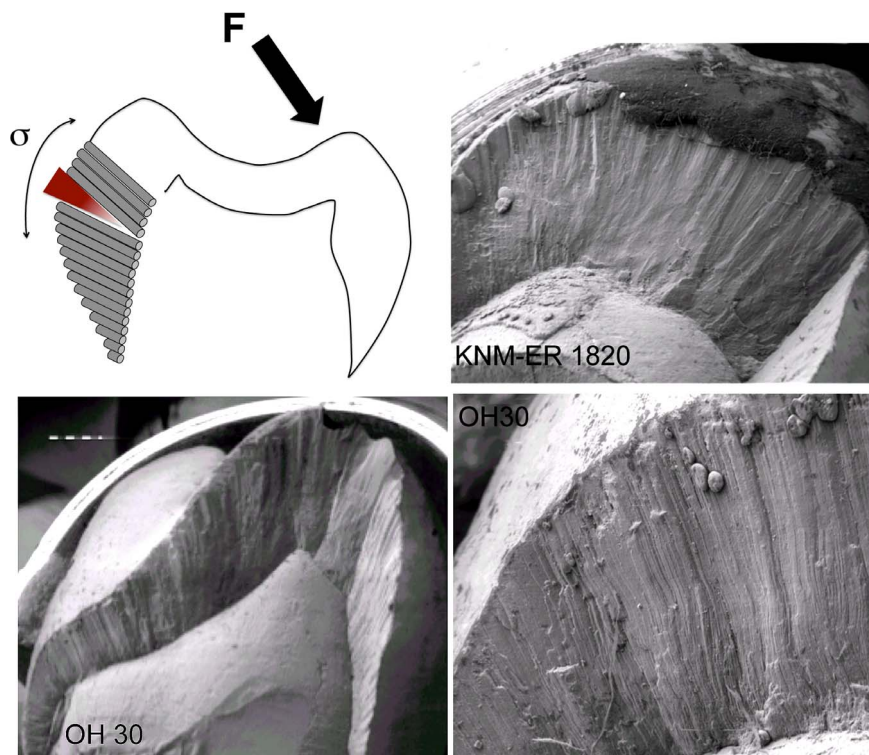

**Figure 2. Illustration of the tensile stresses ( $\sigma$ ) and resulting breakages in *P. boisei* teeth.** Tensile stresses ( $\sigma$ ) would occur when lateral loads are applied to a straight-walled tooth and the force vector is directed outside the dental tissue. Without decussating enamel, i.e. bundles of enamel prisms crossing over, transverse cracks initiated on the unloaded side will propagate through the tissue and will lead to catastrophic failure of the tooth. Cracks tend to travel along the protein-rich prism sheaths and are stopped by differently-oriented prisms. Such oblique/transverse breakages are frequently found in *P. boisei* teeth and are illustrated here in a sample of SEM pictures. Although these breaks may have occurred post mortem, they illustrate the plane of least resistance and thus allow an assessment of the loading conditions to which the tooth should not have been subjected *in vivo*. Images are not to scale and are for illustration only.

doi:10.1371/journal.pone.0084942.g002

$$DEE = \sum_{i=1}^n A_i$$

where  $A_i$  is the energetic cost (kcal) of an individual activity ' $i$ ' and

$$A_i = (D_i \times BMR \times T_i) \times 100$$

where  $T_i$  is the percentage of the day spent performing an activity  $i$  and  $D_i$  is the energy constant for each activity, in this case:  $D_{\text{sleep}} = 1$ ,  $D_{\text{rest}} = 1.25$ ,  $D_{\text{feed}} = 1.38$ ,  $D_{\text{social}} = 2.35$  [44]. As limb lengths for *P. boisei* are not known, the energetic cost of locomotion  $A_{\text{loc}}$  (kcal) was calculated using the generalised mammalian equation [45] together with the average time budgets of adult Amboseli baboons during the dry and wet seasons [46].

$$A_{\text{loc}} = (0.041 \times W^{0.60}) \times R_D + (0.029 \times W^{0.75}) \times T_{\text{loc}}$$

where  $W$  is body mass,  $R_D$  is the day range (km) and  $T_{\text{loc}}$  is the time spent moving. Body mass estimates from fossil remains are contentious [47], therefore the energetic requirements across the entire body mass range of *P. boisei*, i.e. 34–49 kg [22], was calculated. The  $DEE$  calculated here is some 5% above  $2 \times \text{BMR}$ , where  $\text{BMR} = 354 W^{0.75}$  per day [9]. Hence, the energetics

calculated can be considered reasonable, as  $DEE$  is commonly regarded to fall between 2–4 times the BMR [48]. Models that maximise the energy, protein and lipid return while, at the same time, minimise the fiber content are regarded most desirable [49]. The effects of feeding time, body mass and increased manipulatory skills on nutritional yield are shown in Figure 3, while the summary results for the different hominin-specific models are presented in Figure 4.

The Trustees of the National Museums of Tanzania and Kenya, Meave Leakey, Emma Mbua and Cassian Magori kindly granted access to fossil specimens in their care, and Fernando Ramirez Rozzi loaned me casts of Ethiopian *Paranthropus* specimens for inspection.

## Results

Yearling baboons depend heavily on their mother's milk [9], but feed some 88 minutes per day on 21 different  $C_4$  foods, which vary in material properties and nutritional value (Table S1 in File S1). Despite their underdeveloped masticatory apparatus, lack of manipulatory skills and physical strengths, they dedicate 53/88 minutes to feeding on corms (Table S1 in File S1). Scaling the volume of food consumed to larger body masses (28–59 kg) and incrementally increasing the time allocated to  $C_4$  foods (Figure 3) results in a nutritional yield that would be sufficient to support a 34–49 kg hominin with some 9700 kJ in 283 minutes (Figure 4b [i.]). Fruits and invertebrates are however limited and/or available only seasonally. Hence, feeding time on these sources was

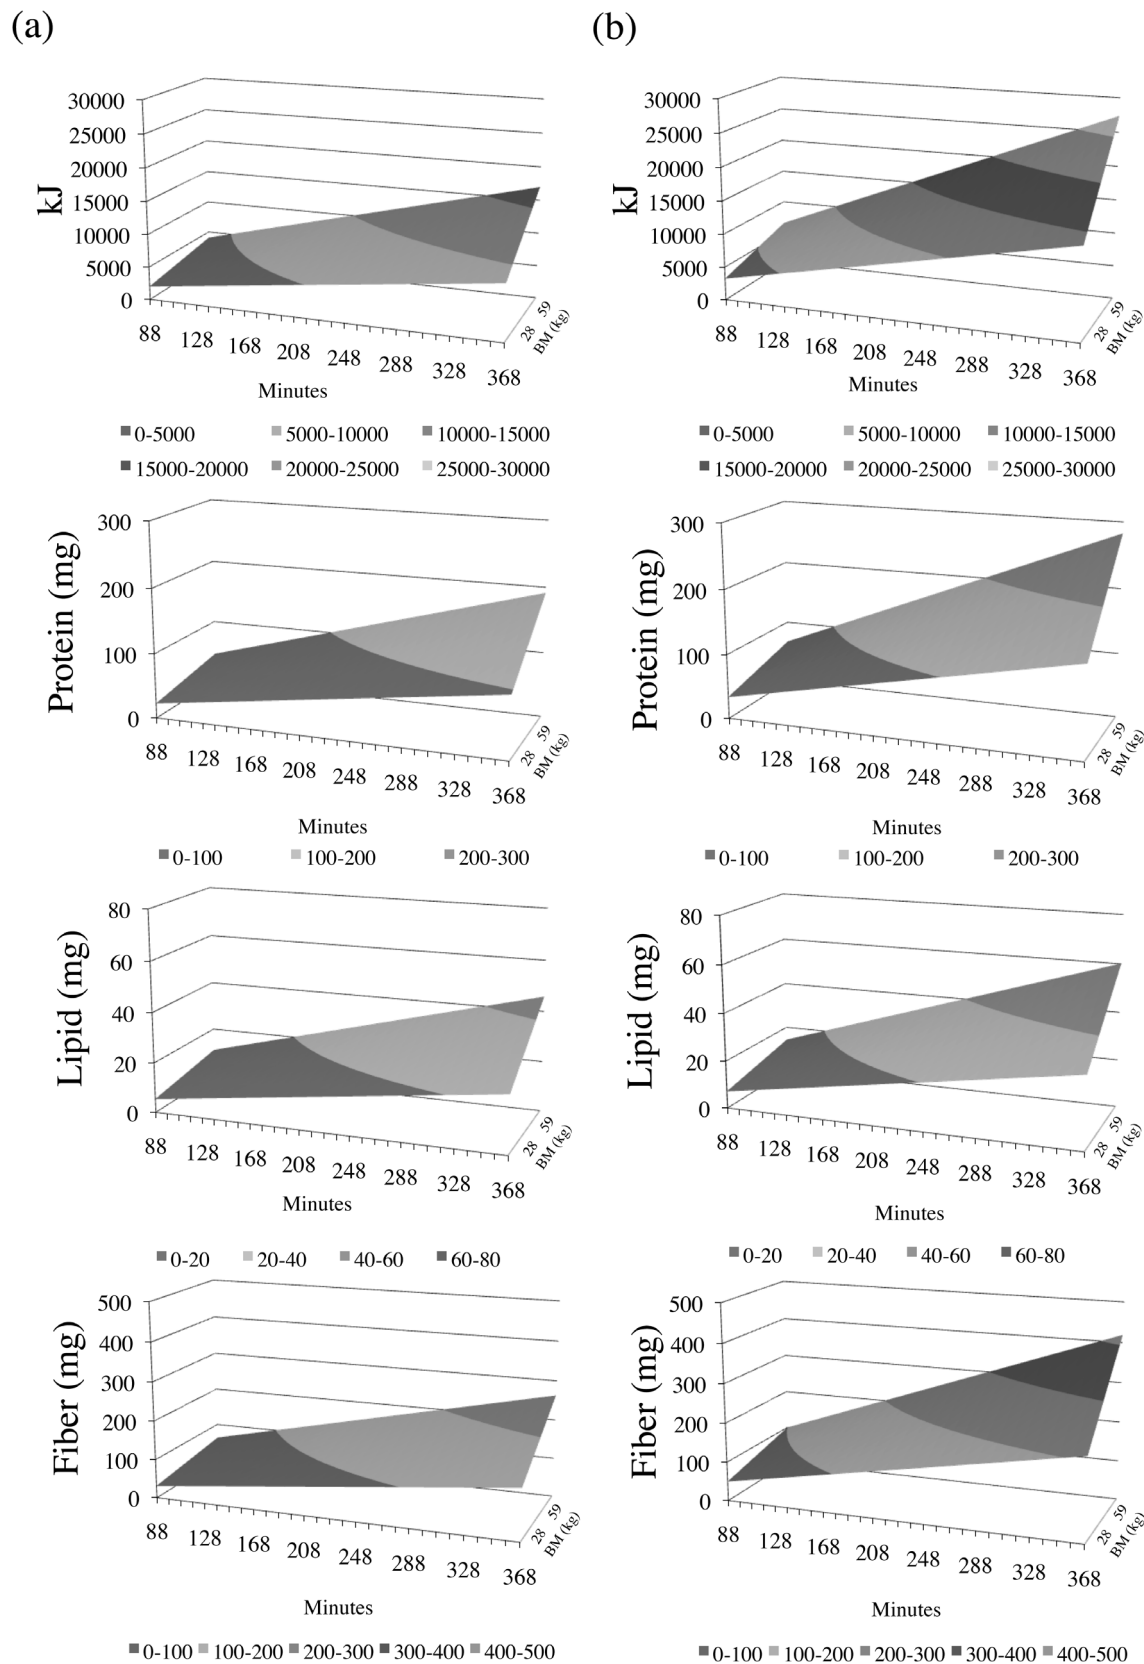

**Figure 3. Changes in nutritional yield (y-axis) as a result of increasing food volume with body mass 28–59 kg (z-axis) at 10-minute increments of feeding on  $C_4$  sources (x-axis) for yearling baboons (a) and yearling baboon with increased manipulatory capabilities  $m=2$ , i.e. a doubling the efficiency ( $B$ ) with which they process corms (b). Incremental steps are highlighted by shaded bands.**  
doi:10.1371/journal.pone.0084942.g003

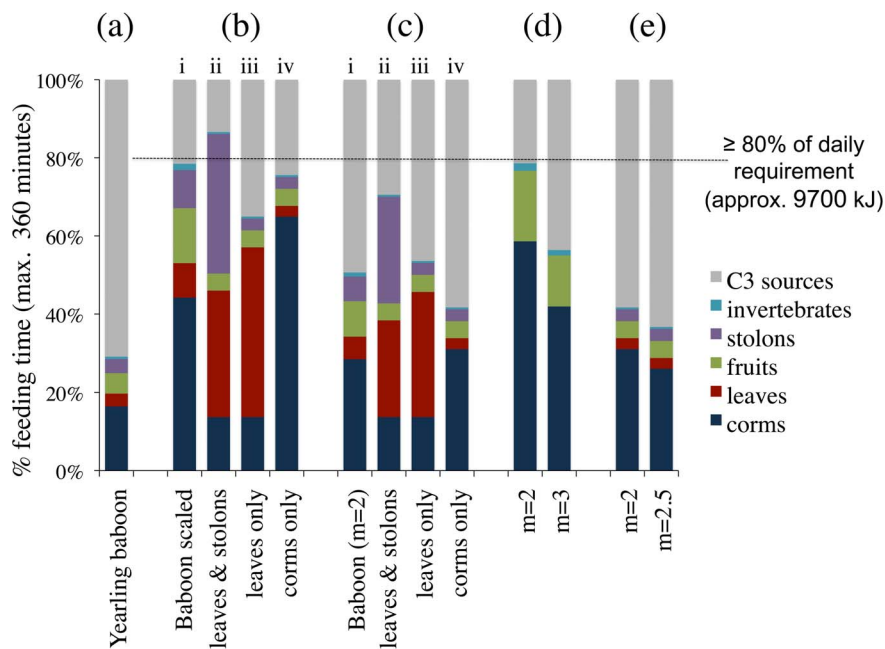

**Figure 4. Summary diagram of the composition of diet eaten by a 34–49 kg hominin.** In (a) the empirical data for yearling *Papio cynocephalus* are shown. In (b) the basic model shown in (a) is scaled up to account for larger body masses and feeding on all  $C_4$  sources is increased until the target of approximately 9700 kJ is reached (i). Then, once the model has been scaled to larger body masses, only the time feeding for stolons, leaves, meristem and seeds is increased (ii.), or on leaves (iii) or corms (iv); feeding time on fruits and invertebrates was kept constant to the level of yearling baboons (ii–iv). In (c) the models outlined in (b) are repeated with improved manipulations skills for the processing of corms ( $m = 2$ ). In (d) only  $C_4$  food sources that are well-suited to be broken down by *P. boisei* dento-cranial morphology, i.e. hard, brittle or soft, are selected. The effects of manipulatory capabilities ( $m$ ) were tested. The models shown in (e) are considered most appropriate for inferences about the feeding ecology of *P. boisei*. These are achieved when all  $C_4$  sources are selected, but only feeding time on corms is increased beyond the time observed in yearling baboons. The total time available for feeding, including foraging, is assumed to be 50% of the day in all models, i.e. 360 minutes. doi:10.1371/journal.pone.0084942.g004

constrained to the level of yearling baboons before the effects of other foods on overall nutritional yield and time budgets were assessed. When the feeding time on only leaves and stolons is increased from the baseline, the target of 9700 kJ cannot be met within the total feeding/foraging time allocated: the animal would have to feed some 312 minutes on  $C_4$  sources. Lengthening the feeding time on leaves improves the result over the basic model (234 minutes), as would preferential feeding on corms (272 minutes). While the former model is problematic on mechanical grounds [50], the latter is unrealistic because yearling baboons, unlike adults, have inadequate manipulation skills to extract and process corms [9]. To account for the greater manipulatory skills of adult baboons or hominins, the yearling baboon processing time for corms/minute ( $B_j$ ) was doubled ( $m = 2$ ), and the analyses were repeated (Figure 4c). As above, (i.) presents the general scaled-up model, while models (ii.)–(iv.) are constrained with regard to fruit and invertebrate intake. Introducing improved manipulation skills results in the target of 9700 kJ being achieved in 178 minutes, i.e. 50% of maximum feeding/foraging time per day (Figure 4c [i.]). Figure 3 illustrates the steep rise in energy (kJ) output with improved manipulation, which is followed by lipids and protein; the increase in fiber content is less pronounced. This is advantageous as fiber constitutes a constraint on baboon size [51] and, by inference, hominins [49]. A preferential increase in feeding on leaves/stolons/meristems and seeds, or leaves only, increases total feeding time, but a preferential increase in corm time decreases the total time to 140 minutes, i.e. 42% (Figure 4c).

To test whether *P. boisei* may have been a dietary specialist, models were then created that included only hard, brittle and soft foods, i.e. all potentially tough foods were excluded. For feeding

time on  $C_4$  foods to fall under 57% (203 minutes) of the total time budget, manipulation skills would need to be increased to 3 times that of a yearling baboon (Figure 4d), while the intake of fruit would need to be unacceptably high. A preferential increase in corm time, which leaves the time for feeding on fruits, flowers and invertebrates at the level of yearling baboons, substantially changes the nutritional yield of the diet, whereby the amount of lipids and proteins decreases and fiber content increases (Figures S2–S5 in File S1). These specialised models are therefore deemed unsuccessful.

A generalised baboon model (Figure 4e) that includes all of the  $C_4$  foods preferred/eaten by yearling baboons, but only increases the feeding time on corms beyond the level consumed by yearling baboons yields the most favourable results, both in terms of time budget and nutritional yield (Figure 4e, Table S3 in File S1). Such a diet would be consistent with *P. boisei* dental morphology: because of their immaturity, the mechanical properties of foods consumed by yearling baboons are not considered particularly demanding, with the exception of corms [9], and hence would have been suitable for *P. boisei* also. Depending on the manual skills for corm extraction inputted, i.e. 2 or 2.5 times that of a yearling baboon, *P. boisei* would have needed to feed some 150 minutes (corms: 112) or 133 minutes (corms: 94) on  $C_4$  sources in order to obtain 9700 kJ. This translates to about 42% and 37% of total daily feeding/foraging time. This value falls sharply below the 75%–80% implied by isotope studies. Importantly, the time-budget calculated would enable an animal to comfortably meet the higher energetic demands of 2–4 times the BMR that regularly occur because of additional costs relating to thermoregulation, predator defence, reproduction etc. [48].

## Discussion

*Paranthropus boisei*, with its highly derived dento-cranial morphology, remains one of the most enigmatic hominins. Suggestions range from masticating hard small objects [40,52], repetitive chewing [53], habitual consumption of soft material [54] and feeding on abrasive grasses [17,55]. Not all proposals are compatible with the species' morphology though (Figure 2). More importantly, the implied dietary specialisation (i.e., stenotopy) is not supported by other evidence [56] or by general considerations about hominin palaeobiology and life history [16]. As *P. boisei* was a highly successful taxon, spanning over 1 myrs and living through fluctuations in the physical environment [57], it is unlikely to have lived on the brink. The results of the present models imply that *P. boisei* could have obtained sufficient nutrient-rich foods within the constraints of its daily time budget for foraging and feeding.

Ascertaining the diet of an extinct species is imprecise at best, and the present study does not pretend otherwise. Rather, the outcomes of the models are of heuristic value as they aim to determine whether a medium-sized large-brained hominin could have subsisted on a predominantly C<sub>4</sub> diet. Such a diet must combine a number of prerequisites: (i.) being readily available within the environment, (ii.) being predominantly made up of the material properties to which the masticatory apparatus of *P. boisei* (or other hominins) is adapted, (iii.) being of sufficient nutritional value to support this hominin but without an excessive fiber load and (iv.), be harvestable within the time budget available. By selecting food sources available within the specific environment and by modifying the empirically derived data of extant baboons *Papio cynocephalus* [9] this can be achieved. Scaling issues and the nutritional diversity of C<sub>4</sub> foods must however be given due regard when reconstructing the dietary ecology of hominins.

The volume of food consumed as well as feeding time increases with body mass [28]. Foods vary in energy and nutrients, and the amount ingested per minute varies between foods [9]. An increase in volume, whether due to body mass, dietary preference or both, will therefore automatically change the total dietary composition and nutritional yield of that diet, simply because the component parts of the diet do not change isometrically with volume. As a case in point, an increase in feeding time on corms increases the nutritional yield more dramatically than an increase in feeding on grasses by the same length of time (provided the manual dexterity of adult baboons/hominins is taken into account). For this reason it is possible for a medium-sized primate to obtain 80% of its daily requirements whilst spending relatively little time feeding on C<sub>4</sub> sources (Figure 4). The relatively low values of 42%–37% suggested for *P. boisei* (Figure 4e) are probably an overestimation still. First, no attempt was made to account for the masticatory capabilities of *P. boisei* as reflected by their large tooth crown areas [41]. Second, the manipulatory skills used are only moderate improvements over the capabilities of small-sized (2.27 kg) yearling baboons. Third, data are forthcoming that suggest that (at least some) corms increase their oil content as they mature, while protein and sugar levels decrease [58]; this would increase the overall energy return. Taken together, a time budget closer to 30% may be more realistic for *P. boisei*. Either way, the relatively high corm content would provide this hominin with high amounts of minerals and vitamins [59], including important fatty acids [60,61]. Importantly, such a diet is compatible with the derived dento-cranial morphology of *P. boisei*, and its dental wear patterns.

Both macro- and microwear patterns of *P. boisei* teeth support propositions that *P. boisei* included a large proportion of corms in its diet. Corms are rich in starches (up to 50%), which are highly abrasive in unheated state and vary in size [*C. esculentus*: 3–12 µm

[62]; *C. rotundus*: 30–110 µm [63]]. Starches are not broken down mechanically though, but chemically through the interaction with amylase contained within saliva [64]; lengthy oral processing would facilitate this process. Unsurprisingly, the rates of wear of Amboseli baboons correlate with corm consumption [65]. The thick enamel of *P. boisei* teeth is almost certainly an adaptation to wear resistance [66], while the flatly worn tooth surfaces bear direct witness to the milling process [67,68], which results in “polished” wear surfaces, i.e. indistinct microwear textures [54]. It is not necessary to invoke agents other than starches to account for *P. boisei*'s unique macro- and microwear patterns. Repetitive chewing (rather than high bite forces) would have been advantageous, and has been inferred on the basis of the species' musculature [53] and its unique temporo-mandibular joint morphology that emphasises lateral pterygoid muscle pull [69], i.e. the transverse movement of the mandible. Although all baboons eat and prefer corms, sometimes in considerable quantities [11–13,70–73], they vary the intake on an inter-annual basis. This seasonal variation in consumption of C<sub>4</sub> corms is expected to dampen the isotopic composition of baboons' tissues, although some populations were reported to have exceptionally high  $\delta^{13}\text{C}$  values [74]. For *P. boisei*, in contrast, corms probably constituted the main staple food which, given their physico-chemical properties, conceivably selected for the species' unique dento-cranial morphology (and bearing in mind the larger quantities consumed due to body mass scaling alone). As is the case for baboons [7], regional, individual and seasonal variations in diet are however expected, as implied by isotope results also [17]. What is noteworthy is that exclusive reliance on only one food source seems unlikely though (as it would be for other hominins).

Foods vary in fiber content, tanins etc. and selective omnivores, like hominins [75], must find an optimal balance between various foods [7–9]. Determining the optimal composition of a primate diet is not trivial [76]. Underlying this work is the assumption that yearling baboons “know” what to eat, i.e. intuitively select food according to their needs, and that the nutritional requirements of a hominin may not differ much. This assumption seems justified, as a radical change in the composition of the diet, i.e. leaving out some foods altogether (Figure 4d, Figure S2–S5 in File S1), resulted in a noticeable dietary imbalance. Although not necessarily detrimental, provided the time budget allows for the supplementation of important nutrients from C<sub>3</sub> sources (with the required material properties), such models should be viewed with caution. The more inclusive models presented in Figure 4e fulfill both the (assumed) nutritional and the time-budget requirements, and are thus considered more appropriate proxies for the dietary ecology of *P. boisei*.

Stable isotope analyses are a useful tool for the reconstruction of the dietary niches of hominins [18]. But not all C<sub>4</sub> foods are low quality. Hominins, like baboons, are likely to have been selective in their food choice. Which C<sub>4</sub> foods were habitually consumed can only be determined on the basis of morphology, including body mass and brain size, and in conjunction with an animal's energetic requirements. *Theropithecus oswaldi*, *P. boisei* and *A. bahrelghazali* are comparable in isotopic composition [17–20], yet their diets most certainly differed. Only *Theropithecus* exhibits the morphological features commonly associated with graminivory that include *inter alia* hyposodont thin-enamelled teeth with shearing crests [4,5] and high levels of prism decussation [77], and absolutely and relatively smaller brains compared with *Papio* [78]. Hominins differ, even among themselves. Unlike *P. boisei*, *A. bahrelghazali* teeth are buttressed and relatively thin enamelled [79]. Excessive consumption of corms can therefore be ruled out and a diet of

predominantly tough foods is implicated. If confirmed, this may indicate that, although morphologically more generalised than *P. boisei*, *A. bahrelghazali* could have been more specialised behaviourally. Regardless, on the basis of the present analyses it is suggested that *P. boisei*, like extant *Papio*, was a dietary generalist, albeit with a preference for corms. It probably was an ecological generalist too. Despite feeding predominantly on savanna C<sub>4</sub> foods, *P. boisei* appears to have occupied fairly wooded well-watered environments [80–82], where corms are known to thrive. This eurybiotic strategy seems to underlie the evolutionary success of *P. boisei*. With the disappearance of deep-water lakes and the onset of an arid cycle at about 1.45 Ma [83] the availability of corms would have declined, while competition with *Papio* and the more encephalized *Homo* for alternative resources would have increased. These factors, either in isolation or in combination, are probably responsible for the demise of *P. boisei*.

## Supporting Information

**File S1 Supporting figures and tables.** Table S1 Primary data used to create the models. Table S2 Summary of the

nutritional yield of each food category used. Figure S1 Scanning electron microscope images of naturally broken teeth of hominins illustrating differences in prism decussation. Figure S2–Figure S5 Differences in kJ, protein, lipid and fiber yielded in the specialised models when different scalars are used for manipulatory skills. (DOCX)

## Acknowledgments

I thank Julia Lee-Thorp for discussions about isotopes and Tim Bromage for help with Figure 2. Special thanks to Meave Leakey for providing high-resolution casts of broken tooth surfaces.

## Author Contributions

Conceived and designed the experiments: GM. Performed the experiments: GM. Analyzed the data: GM. Contributed reagents/materials/analysis tools: GM. Wrote the paper: GM.

## References

- Jolly CJ (1970) The seed eaters: a new model of hominid differentiation based on a baboon analogy. *Man* 5: 5–26.
- Jolly CJ (2001) A proper study for mankind: analogies from the papionin monkeys and their implications for human evolution. *Yrbk Phys Anthropol* 44: 177–204.
- Elton S (2006) Forty years on and still going strong: the use of hominid-cercopithecoid comparisons in palaeoanthropology. *J Roy Anthropol Inst* 12: 19–38.
- Jablonski NG, ed. (1993) *Theropithecus. The rise and fall of a genus*. Cambridge: Cambridge University Press.
- Jablonski NG, Leakey MG, eds. (2008) *Koobi Fora Research Project. Vol. 6. The fossil monkeys*. San Francisco: California Academy of Science.
- Hatley T, Kappelman J (1980) Bears, pigs, and Plio-Pleistocene hominids: A case for the exploitation of belowground food resources. *Hum Ecol* 8: 371–387.
- Alberts SC, Hollister-Smith JA, Mututua RS, Sayialel SN, Muruthi PM et al. (2005) Seasonality and long-term change in a savanna environment. In: Brockmann DK, van Schaik CP, editors. *Seasonality in Primates*. Cambridge: Cambridge University Press, 157–195.
- Altmann SA (2009) Fallback foods, eclectic omnivores, and the packaging problem. *Am J Phys Anthropol* 140: 615–629.
- Altmann SA (1998) *Foraging for Survival*. University of Chicago Press, Chicago.
- Bronikowski AM, Altmann J (1996) Foraging in a variable environment: weather patterns and the behavioural ecology of baboons. *Behav Ecol Sociobiol* 39: 11–25.
- Whiten A, Byrne RW, Henzi SP (1987) The behavioural ecology of mountain baboons. *Int J Primatol* 8: 37–388.
- Whiten A, Byrne RW, Barton RA, Waterman PG, Henzi SP et al. (1991) Dietary and foraging strategies of baboons. *Phil Trans R Soc Lond B* 334: 187–197.
- Byrne RW, Whiten A, Henzi SP, McCulloch FM (1993) Nutritional constraints on mountain baboons (*Papio ursinus*): implications for baboon socioecology. *Behav Ecol Sociobiol* 33: 233–246.
- van Woerden JT, van Schaik CP, Isler K (2010) Effects of seasonality on brain size evolution: evidence from strepsirrhine primates. *Am Nat* 176: 758–767.
- van Woerden JT, Willems EP, van Schaik CP, Isler K (2011) Large brains buffer energetic effects of seasonal habitats in catarrhine primates. *Evolution* 66: 191–199.
- Navarrete A, van Schaik CP, Isler K (2011) Energetics and the evolution of human brain size. *Nature* 480: 91–94.
- Cerling TE, Mbua E, Kirera FM, Manthi FK, Grine FE et al. (2011) Diet of *Paranthropus boisei* in the early Pleistocene of East Africa. *Proc Natl Acad Sci USA* 108: 9337–9341.
- Cerling TE, Manthi FK, Mbua EN, Leakey LN, Leakey MG et al. (2013) Stable isotope-based diet reconstructions of Turkana Basin hominins. *Proc Natl Acad Sci USA* 110: 10501–10506.
- Cerling TE, Christ KL, Jablonski NG, Leakey MG, Manthi FK (2013) Diet of *Theropithecus* from 4 to 1 Ma in Kenya. *Proc Natl Acad Sci USA* 110: 10507–10512.
- Lee-Thorp J, Likous A, Mackaye HT, Vignaud P, Sponheimer M et al. (2012) Isotopic evidence for an early shift to C<sub>4</sub> resources by Pliocene hominins in Chad. *Proc Natl Acad Sci USA* 109: 20369–20372.
- Lee-Thorp J (2011) The demise of “Nutcracker Man”. *Proc Natl Acad Sci USA* 108: 9319–9320.
- McHenry H, Coffing K (2000) *Australopithecus to Homo*: Transformations in body and mind. *Annu Rev Anthropol* 29: 125–146.
- Koch PL, Behrensmeyer AK, Fogel ML (1991) The isotopic ecology of plants and animals in Amboseli National Park, Kenya. Annual Report of the Director of the Geophysical Laboratory, Carnegie Institution of Washington 1990–1991, 163–171.
- Peters CR, Vogel JC (2005) Africa’s wild C<sub>4</sub> plant foods and possible early hominid diets. *J Hum Evol* 48: 219–236.
- Sage RF, Christin PA, Edwards EJ (2011) The C<sub>4</sub> plant lineages of planet Earth. *J Exp Botany* 63: 6297–6308.
- Deblauwe I, Janssens GPJ (2008) New insights in insect prey choice by chimpanzees and gorillas in Southwest Cameroon: the role of nutritional value. *Am J Phys Anthropol* 135: 42–55.
- Bonnefille R (2010) Cenozoic vegetation, climate change and hominid evolution in tropical Africa. *Global Planet. Change* 72: 390–411.
- Ross CF, Washington RL, Eckhardt A, Reed DA, Vogel ER et al. (2009) Ecological consequences of scaling of chew cycle duration and daily feeding time in Primates. *J Hum Evol* 56: 570–585.
- von Koenigswald W, Rensberger JM, Pfretzschner HU (1987) Changes in the tooth enamel of early Paleocene mammals allowing increased diet diversity. *Nature* 328: 150–152.
- Rensberger JM (2000) Pathways to functional differentiation in mammalian enamel. In: Teaford MF, Smith MM, Ferguson MWJ, editors. *Development, function and evolution of teeth*. Cambridge: Cambridge University Press, 252–268.
- Osborn JW (1968) Evaluation of previous assessments of prism directions in human enamel. *J Dent Res* 47: 217–233.
- Jiang Y, Spears IR, Macho GA (2003) An investigation into fractured surfaces of enamel of modern human teeth: A combined SEM and computer visualisation study. *Arch Oral Biol* 48: 449–457.
- Macho GA, Jiang Y, Spears IR (2003) Enamel microstructure: A truly three-dimensional structure. *J Hum Evol* 45: 821–830.
- Macho GA (2004) On the scaling relationship between enamel prism length and enamel thickness in primate molars: a comment. *Ann Anat* 186: 413–416.
- Boyde A (1989) *Enamel*. In: Oksche A, Vollrath L, editors. *Handbook of Microscopic Anatomy Vol V/6: Teeth*. Berlin: Springer Verlag, 309–473.
- Macho GA, Shimizu D, Jiang Y, Spears IR (2005) *Australopithecus anamensis*: A finite element approach to studying the functional adaptations of extinct hominins. *Anat Rec* 283: 310–318.
- Macho GA, Shimizu D (2010) Kinematic parameters inferred from enamel microstructure: new insights into the diet of *Australopithecus anamensis*. *J Hum Evol* 58: 23–32.
- Shimizu D, Macho GA, Spears IR (2005) The effect of prism orientation and loading direction on contact stresses in prismatic enamel: Implications for interpreting wear patterns. *Am J Phys Anthropol* 126: 427–434.
- Shimizu D, Macho GA (2008) The effect of chemical composition and enamel prism decussation on the biomechanical behaviour of dental tissue: a theoretical approach to determine the loading conditions to which modern human teeth are adapted. *Anat Rec* 291: 175–182.
- Dominy NJ, Vogel ER, Yeakel JD, Constantino P, Lucas PW (2008) Mechanical Properties of Plant Underground Storage Organs and Implications for Dietary Models of Early Hominins. *Evol Biol* 35: 159–175.
- Wood B (1991) *Koobi Fora Research Project. Vol. 4*. Oxford: Clarendon Press.

42. Coelho AM (1974) Socio-bioenergetics and sexual dimorphism in primates. *Primates* 15: 263–269.
43. Coelho AM (1986) Time and energy budgets. In: Mitchell G, Erwin J, editors. *Comparative primate biology*. 2A. Behaviour, conservation and ecology. New York: Alan R. Liss, 141–166.
44. Leonard WR, Robertson ML (1997) Comparative primate energetics and hominid evolution. *Am J Phys Anthropol* 102: 265–281.
45. Taylor CR, Schmidt-Nielsen K, Raab RL (1970) Scaling of energetic cost of running to body size. I. Mammals. *Am J Physiol* 219: 1104–1107.
46. Post DG (1981) Activity patterns of yellow baboons (*Papio cynocephalus*) in the Amboseli National Park, Kenya. *Anim Behav* 29: 357–374.
47. Robson SL, Wood B (2008) Hominin life history: reconstruction and evolution. *J Anat* 212: 394–425.
48. Pontzer H, Kamilar JM (2009) Great ranging associated with greater reproductive investment in mammals. *Proc Natl Acad Sci USA* 106: 192–196.
49. Milton K, Demment MW (1988) Digestion and passage kinetics of chimpanzees fed high and low fiber diets and comparisons with human data. *J Nutr* 118: 1082–1088.
50. Lucas PW, Turner IM, Dominy NJ, Yamashita N (2000) Mechanical Defences to Herbivory. *Ann Bot* 86: 913–920.
51. Demment MW (1983) Feeding ecology and the evolution of body size in baboons. *Afr J Ecol* 21: 219–233.
52. Tobias PV (1967) *The cranium and maxillary dentition of Australopithecus (Zinjanthropus) boisei. Olduvai Gorge*. Cambridge: Cambridge University Press.
53. Demes B, Creel N (1988) Bite force, diet, and cranial morphology of fossil hominids. *J Hum Evol* 17: 657–670.
54. Ungar PS, Grine FE, Teaford MF (2008) Dental microwear and diet of the Plio-Pleistocene hominin *Paranthropus boisei*. *PlosOne* 3, e2044.
55. Grine FE, Sponheimer M, Ungar PS, Lee-Thorp J, Teaford MF (2012) Dental microwear and stable isotopes inform the paleoecology of extinct hominins. *Am J Phys Anthropol* 148: 285–317.
56. Wood B, Strait D (2004) Patterns of resource use in early *Homo* and *Paranthropus*. *J Hum Evol* 46: 119–162.
57. Wood B, Constantino P (2007) *Paranthropus boisei*: Fifty years of evidence and analysis. *Yrbk Phys Anthropol* 50: 106–132.
58. Turesson H, Marttila S, Gustavsson KE, Hofvander P, Olsson ME et al. (2010) Characterization of oil and starch accumulation in tubers of *Cyperus esculentus* var. *sativus* (Cyperaceae): A novel model system to study oil reserves in nonseed tissues. *Am J Botany* 97: 1884–1893.
59. Arafat SM, Gaafar AM, Basuny AM, Nassef SL (2009) Chufa tubers (*Cyperus esculentus* L.): As a new source of food. *World Appl Sci J* 7: 151–156.
60. Bond B, Fernandez DR, Vanderjagt DJ, Williams M, Huang YS et al. (2005) Fatty acid, amino acid and trace mineral analysis of three complementary foods from Jos, Nigeria. *J Food Comp Anal* 18: 675–690.
61. Glew RH, Glew RS, Chuang LT, Huang YS, Millson M et al. (2006) Amino acid, mineral and fatty acid content of pumpkin seeds (*Cucurbita spp.*) and *Cyperus esculentus* nuts in the Republic of Niger. *Plant Foods Hum Nutr* 61: 51–56.
62. Umerie SC, Obi NAN, Okafor EO (1997) Isolation and characterization of starch from *Cyperus esculentus* Tubers. *Biosource Tech* 62: 63–65.
63. Umerie SC, Ezeuzo HO (2000) Physicochemical characterization and utilization of *Cyperus rotundus* starch. *Bioresource Tech* 72: 193–196.
64. Perry GH, Dominy NJ, Claw KG, Lee AS, Fiegler H et al. (2007) Diet and the evolution of human amylase gene copy number variation. *Nature Gen* 39: 1256–1260.
65. Galbany J, Altmann J, Pérez-Pérez A, Alberts SC (2011) Age and individual foraging behavior predict tooth wear in Amboseli baboons. *Am J Phys Anthropol* 144: 51–59.
66. Macho GA, Shimizu D (2009) Dietary niches of South African australopithecines: inference from enamel prism attitude. *J Hum Evol* 57: 241–247.
67. Tobias PV (1980) The natural history of the helicoidal occlusal plane and its evolution in early *Homo*. *Am J Phys Anthropol* 53: 173–187.
68. Smith HB (1984) Patterns of molar wear in hunter-gatherers and agriculturalists. *Am J Phys Anthropol* 63: 39–56.
69. duBrul EL (1977) Early Hominid Feeding mechanism. *Am J Phys Anthropol* 47: 305–320.
70. Bentley-Condit VK (2009) Food choices and habitat use by Tana River Yellow baboons (*Papio cynocephalus*): A preliminary report on five years of data. *Am J Primatol* 71: 432–436.
71. Pochron ST (2000) The core dry-season diet of Yellow baboons (*Papio hamadryas cynocephalus*) in Ruaha National Park, Tanzania. *Folia Primatol* 71: 346–349.
72. Post DG (1982) Feeding behavior of yellow baboons (*Papio cynocephalus*) in the Amboseli National Park, Kenya. *Int J Primatol* 3: 403–430.
73. Swedell L, Hailemeskel G, Schreier A (2007) Composition and seasonality of diet in wild hamadryas baboons: Preliminary findings from Filoha. *Folia Primatol* 79: 476–490.
74. Codron D, Lee-Thorp JA, Sponheimer M, de Ruiter D, Codron J (2008) What insights can baboon feeding ecology provide for early hominin niche differentiation? *Int J Primatol* 29: 757–772.
75. Chivers DJ (1998) Measuring food intake in wild animals: primates. *Proc Nutr Soc* 57: 321–332.
76. Milton K (2003) Micronutrient intakes of wild primates: are humans different? *Com Biochem Phys* 136: 47–59.
77. Macho GA, Reid DJ, Leakey MG, Jablonski N, Beynon DA (1996) Climatic effects on dental development of *Theropithecus oswaldi* from Koobi Fora and Olorgesailie. *J Hum Evol* 30: 57–70.
78. Isler K, Kirk EC, Miller JMA, Albrecht GA, Gelvin BR et al. (2008) Endocranial volumes of primate species: scaling analyses using a comprehensive and reliable data set. *J Hum Evol* 55: 967–978.
79. Brunet M, Beauvilain A, Coppens Y, Heintz E, Moutaye AHE et al. (1995) The first australopithecine 2,500 kilometers west of the Rift Valley (Chad). *Nature* 378: 273–275.
80. Ashley GM, Barboni D, Dominguez-Rodrigo M, Bunn HT, Mabulla AZP et al. (2010) A spring and wooded habitat at FLK Zinj and their relevance to origins of human behavior. *Quat Res* 74: 304–314.
81. Reed KE (1997) Early hominid evolution and ecological change through the African Plio-Pleistocene. *J Hum Evol* 32: 289–322.
82. Shipman P, Harris JM (1988) Habitat Preference and Paleoecology of *Australopithecus boisei* in Eastern Africa. In: Grine FE, editor. *Evolutionary History of the “Robust” Australopithecines*. New York: Aldine de Gruyter, 343–381.
83. Shultz S, Maslin M (2013) Early Human Speciation, Brain Expansion and Dispersal Influenced by African Climate Pulses. *PlosOne* 8: e76750.
